# Supplementary figures and images for: Decoupled maternal and zygotic genetic effects shape the evolution of development
Source: eLife journal article supplement (doi:10.7554/elife.37143), 2018-09-10

Figure 2 - Supplement 1.

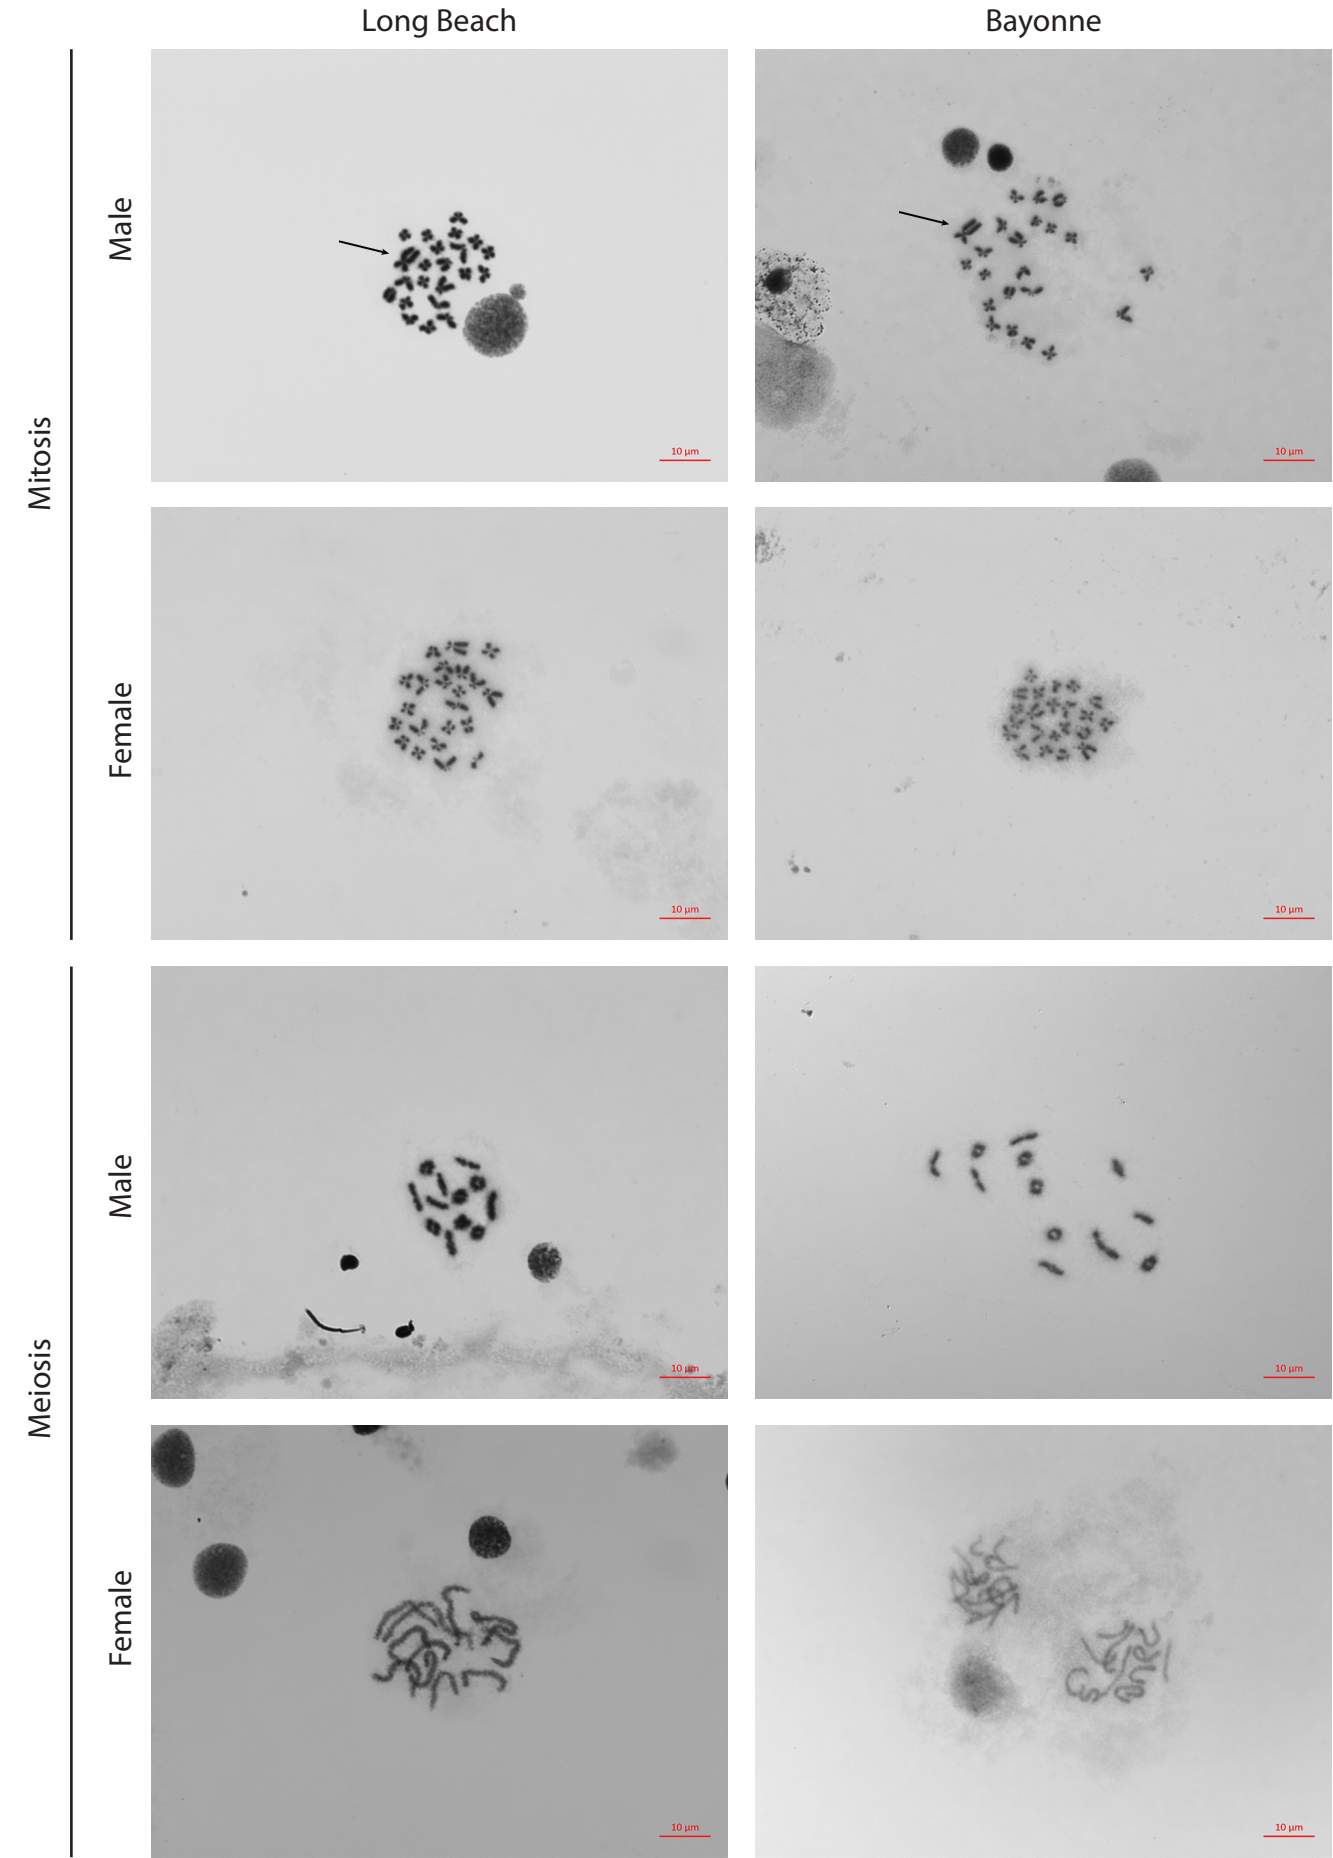

Supplement: supp [file elife-37143-supp-v1.zip]
